# Supplementary figures and images for: H3K36 methyltransferase NSD1 protects against osteoarthritis through regulating chondrocyte differentiation and cartilage homeostasis
Source: Research Square preprint supplement (doi:10.21203/rs.3.rs-3270831/v1), 2023-09-07

**A**

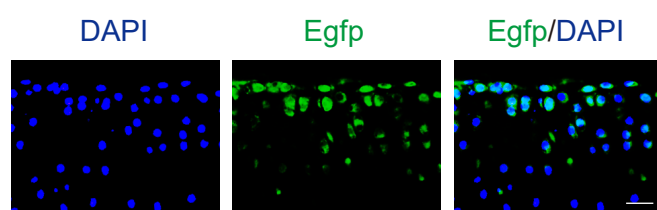

Supplement: Supplementary file 1 [file dd377b901834b2b3f03a1b51.pdf]
